# Supplementary material for: Novel Glial Cells Missing-2 (GCM2) variants in parathyroid disorders
Source: PubMed Central journal article supplement (PMC8859918; doi:10.1530/eje-21-0433), 2022-01-13
Supplement: supplementary_table_1.pdf [file supplementary_table_1.pdf]

**Supplementary Table 1 Characteristics of FIHP Kindreds**

| Characteristics of 19 Kindreds Studied |                           |                    |                 |                     |                      |     | Initial Chemistries (normal range) |                                    |                                            |                           |                                             |                         |                                     | Parathyroid Characteristics |                          |                               |                                    | Clinical Manifestations           |                                                                   |   |    |
|----------------------------------------|---------------------------|--------------------|-----------------|---------------------|----------------------|-----|------------------------------------|------------------------------------|--------------------------------------------|---------------------------|---------------------------------------------|-------------------------|-------------------------------------|-----------------------------|--------------------------|-------------------------------|------------------------------------|-----------------------------------|-------------------------------------------------------------------|---|----|
| Pedigree Location                      | Family 1,2 Or 3 of Fig 5A | Kindred Identifier | <sup>a</sup> No | Relation to Proband | Pedigree identifiers | Sex | GCM2 Variant                       | <sup>c</sup> Age at DX of PHPT (Y) | <sup>d</sup> Ser Tot Ca (2.05-2.50 mmol/L) | Ser Int PTH (10-65 pg/mL) | Ser Ion Ca <sup>2+</sup> (1.17-1.31 mmol/L) | Ser P (2.7 - 4.5 mg/dL) | 24-h Urine Ca (1.3 - 7.5 mmol/24 h) | <sup>f</sup> UCCR           | Tot No of Excised Glands | Normal Glands by Biopsy (y/n) | Largest Size of Largest Gland (cm) | Pathology of Excised Parathyroids | Osteoporosis (O) Nephrolithiasis (N) Fractures (F) Yes (y)/No (n) |   |    |
|                                        |                           |                    |                 |                     |                      |     |                                    |                                    |                                            |                           |                                             |                         |                                     |                             |                          |                               |                                    |                                   | O                                                                 | N | F  |
| San Giovanni Rotondo                   | 2                         | VS                 | 6               | proband             | II:3                 | M   | <sup>#</sup> p.T386S (het)         | 58                                 | 3.7                                        | 113                       | 2.25                                        | 2.2                     | 36.7                                | 0.023                       | 3                        | n                             | 1.8                                | hyperplasia                       | y                                                                 | y | n  |
|                                        |                           |                    |                 | mother              | I:2                  | F   | p.T386S (het)                      | 90*                                | 2.23                                       | 62                        | <sup>e</sup> na                             | 3.7                     | na                                  | na                          | /                        | /                             | /                                  |                                   | na                                                                | y | na |
|                                        |                           |                    |                 | son                 | III:1                | M   | p.T386S (het)                      | 29*                                | 2.4                                        | 58                        | 1.22                                        | 3.2                     | na                                  | na                          | /                        | /                             | /                                  |                                   | na                                                                | y | na |
|                                        |                           |                    |                 | sister              | II:2                 | F   | p.T386S (het)                      | 65                                 | 2.99                                       | 104                       | 1.56                                        | 2.9                     | na                                  | na                          | 4                        | n                             | 2.6                                | hyperplasia                       | n                                                                 | y | n  |
|                                        |                           |                    |                 | sister              | II:1                 | F   | <sup>b</sup> Neg                   | 69*                                | 2,27                                       | 56                        | na                                          | 3,2                     | na                                  | na                          | /                        | /                             | /                                  |                                   | na                                                                | n | na |
|                                        |                           |                    |                 | brother             |                      | M   | Neg                                | 67*                                | 2.37                                       | 51                        | na                                          | na                      | na                                  | na                          | /                        | /                             | /                                  |                                   | na                                                                | n | na |
|                                        |                           | NP W               | 2               | proband             |                      | F   | Neg                                | 59                                 | 2.9                                        | 76                        | 1.45                                        | 3.21                    | 5.7                                 | 0.016                       | 2                        | y (1)                         | 1                                  | adenoma                           | y                                                                 | y | n  |
|                                        | sister                    |                    |                 |                     | F                    | Neg | 60                                 | 2.62                               | 82                                         | 1.31                      | 2.45                                        | 6.4                     | 0.021                               | 1                           | n                        | 0.8                           | adenoma                            | y                                 | y                                                                 | n |    |
|                                        |                           | OS                 | 2               | proband             |                      | F   | Neg                                | 35                                 | 3.75                                       | 1410                      | 1.89                                        | 2.4                     | 13.6                                | 0.056                       | 1                        | n                             | 3                                  | adenoma                           | n                                                                 | n | n  |

|  |  |    |        |          |      |     |               |      |      |      |      |      |      |        |                             |   |             |                     |    |    |   |
|--|--|----|--------|----------|------|-----|---------------|------|------|------|------|------|------|--------|-----------------------------|---|-------------|---------------------|----|----|---|
|  |  |    | mother |          | F    | Neg |               | 2.92 | 118  | 1.48 | 2.58 | 5.2  | 0.02 | 1      | n                           | 1 | hyperplasia | n                   | n  | n  |   |
|  |  | NR | 2      | proband  |      | F   | Neg           | 47   | 2.96 | 251  | 1.49 | 1.63 | 10.7 | 0.032  | 3                           | n | 1.5         | hyperplasia         | y  | y  | n |
|  |  |    |        | sister   |      | F   | Neg           | 19   | 2.74 | 61   | 1.38 | 3.84 | 4.8  | 0.012  | /                           | / | /           |                     | n  | y  | n |
|  |  |    |        | proband  |      | F   | Neg           | 40   | 2.8  | 155  | 1.41 | 2.5  | 10.1 | 0.03   | 1                           | n | 1.2         | adenoma             | y  | n  | y |
|  |  |    |        | mother   |      | F   | Neg           | 63   | 2.74 | 112  | 1.36 | 3.47 | 4.2  | 0.012  | 2                           | n | 1           | hyperplasia         | y  | n  | y |
|  |  |    |        | proband  |      | F   | Neg           | 51   | 2.65 | 37   | 1.40 | 4.3  | 7.97 | 0.019  | /                           | / | /           |                     | y  | y  | n |
|  |  |    |        | sister   |      | F   | Neg           | 53   | 2.68 | 43   | 1.37 | 3.15 | 4.98 | 0.016  | /                           | / | /           |                     | y  | n  | n |
|  |  |    |        | proband  |      | F   | Neg           | 69   | 2.82 | 112  | 1.41 | 2.6  | 9.12 | 0.023  | 1                           | n | 1.2         | hyperplasia         | y  | y  | n |
|  |  |    |        | daughter |      | F   | Neg           | 45   | 2.78 | 163  | 1.34 | 2.9  | 7.42 | 0.02   | /                           | / | /           |                     | n  | n  | n |
|  |  |    |        | nephew   |      | M   | Neg           | 40   | 2.75 | 86.5 | 1.39 | 2.5  | 7.22 | 0.02   | /                           | / | /           |                     | n  | n  | n |
|  |  |    |        | proband  |      | M   | Neg           | 77   | 3.1  | 173  | 1.56 | 1.6  | 9.7  | na     | refused surgery             | / | /           |                     | Y  | n  | y |
|  |  |    |        | son      |      | M   | Neg           | 55   | 2.75 | 174  | 1.39 | 1.7  | 12.7 | na     | 1                           | n | 1.7         | adenoma             | Y  | y  | y |
|  |  |    |        | proband  |      | F   | p.Y282D (het) | 49   | 2.52 | 86.4 | 1.34 | 2.96 | 7.7  | na     | 3                           | n | 1.4         | adenoma hyperplasia | n  | y  | n |
|  |  |    |        | daughter |      | F   | Neg           | 34   | 2.6  | 114  | 1.38 | 4.2  | 10.5 | na     | 3                           | n | 1.6         | hyperplasia         | n  | n  | n |
|  |  |    |        | daughter |      | F   | Neg           | 28   | 2.76 | 135  | 1.54 | 1.8  | 13.9 | na     | 1                           | n | 1           | adenoma             | n  | n  | n |
|  |  |    |        | proband  | I:2  | F   | p.Y394S (het) | 62   | 2.62 | 62   | 1.37 | 3.2  | 7.1  | 0.023  | <sup>§</sup> No surgery yet | / | /           |                     | y  | n  | n |
|  |  |    |        | son      | II:1 | M   | p.Y394S (het) | 44   | 2.65 | 43.2 | 1.33 | 2.9  | 4.6  | na     | /                           | / | /           |                     | n  | n  | n |
|  |  |    |        | son      | II:2 | M   | p.Y394S (het) | 43   | 2.55 | 33.5 | 1.32 | 2.83 | 5.6  | 0.02   | /                           | / | /           |                     | n  | y  | n |
|  |  |    |        | proband  |      | F   | Neg           | 37   | na   | 161  | 1.67 | na   | na   | na     | 1                           | n | na          | adenoma             | na | na | n |
|  |  |    |        | daughter |      | F   | Neg           | 20   | 2.62 | 39   | 1.32 | 2.7  | 2.62 | 0.019  | 1                           | n | 1.1         | adenoma             | n  | n  | n |
|  |  |    |        | proband  |      | F   | p.Y282D (het) | 56   | 2.42 | 81   | 1.36 | 3    | 8.6  | 0.025  | 3                           | n | 1.2         | hyperplasia         | Y  | y  | n |
|  |  |    |        | sister   |      | F   | Neg           | 57   | 2.74 | 85   | 1.38 | 3    | 2.8  | 0.0095 | /                           | / | /           |                     | Y  | n  | n |

|     |   |         |  |   |     |    |      |     |      |     |      |       |    |   |     |           |         |    |    |
|-----|---|---------|--|---|-----|----|------|-----|------|-----|------|-------|----|---|-----|-----------|---------|----|----|
| 671 | 2 | proband |  | F | Neg | 59 | 3.17 | 640 | 1.8  | 2.1 | 3.47 | 0.01  | 1  | n | 4   | carcinoma | Y       | y  | n  |
|     |   | mother  |  | F | Neg | 69 | na   | na  | na   | na  | na   | na    | na | 1 | n   | 1.8       | adenoma | na | na |
| 799 | 2 | proband |  | M | Neg | 22 | 3.77 | 252 | 2.04 | 2.5 | 11.1 | 0.027 | 1  | n | 3   | adenoma   | Y       | y  | n  |
|     |   | mother  |  | F | Neg | 48 | 2.57 | 66  | 1.39 | 2.1 | 10.2 | 0.02  | 1  | n | 1.4 | adenoma   | n       | n  | n  |

|     |   |          |  |   |                  |    |      |     |      |     |       |       |   |   |     |             |   |   |   |
|-----|---|----------|--|---|------------------|----|------|-----|------|-----|-------|-------|---|---|-----|-------------|---|---|---|
| 388 | 2 | proband  |  | F | Neg              | 53 | 2.92 | 252 | 1.53 | 2.3 | 5.37  | 0.02  | 3 | n | 3.0 | hyperplasia | Y | n | n |
|     |   | daughter |  | F | Neg              | 25 | na   | 59  | 1.35 | na  | 6.72  | na    | / | / | /   |             |   | n | n |
| 503 | 2 | proband  |  | F | Neg              | 33 | 2.4  | 55  | 1.35 | 3.5 | 3.63  | 0.012 | 1 | n | 1   |             | n | y | n |
|     |   | father   |  | M | p.Y282D<br>(het) | 60 | 2.69 | 248 | 1.53 | 2.6 | 5.95  | na    | 1 | n | 1.5 | adenoma     | Y | y | n |
| 573 | 2 | proband  |  | F | Neg              | 43 | 2.6  | 143 | 1.36 | 3.2 | 12.22 | 0.027 | 1 | n | 1.4 | adenoma     | n | y | n |
|     |   | mother   |  | F | Neg              | 67 | 2.52 | 88  | 1.39 | 3.3 | 4.4   | 0.017 | / | / | /   |             | y | n | n |

Symbols:

#Novel variants identified in kindreds in this study are denoted in red

\* age at recruitment

|         |   |     |   |          |      |   |                      |     |      |     |      |      |       |      |   |   |     |                           |   |   |   |
|---------|---|-----|---|----------|------|---|----------------------|-----|------|-----|------|------|-------|------|---|---|-----|---------------------------|---|---|---|
|         |   | 823 | 2 | proband  |      | F | Neg                  | 48  | 2.57 | 226 | 1.5  | 2.75 | 8.4   | 0.01 | 1 | n | 2.3 | adenoma                   | Y | y | n |
|         |   |     |   | daughter |      | F | Neg                  | 18  | 2.71 | 81  | 1.41 | 2.3  | 4.7   | 0.01 | 1 | n | 1.8 | adenoma                   | n | n | n |
| Bologna | 3 | GI  | 4 | proband  | II:1 | M | <b>p.I383M (het)</b> | 38  | 3.29 | 230 | na   | 2    | 13.97 | na   | 3 | n | 3.5 | carcinoma hyperplasia     | n | y | n |
|         |   |     |   | mother   | I:2  | F | <b>p.I383M (het)</b> | 67  | 2.57 | 95  | na   | 2.6  | 5.34  | na   | 2 | n | 1   | adenoma                   | y | n | y |
|         |   |     |   | uncle    | I:3  | M | <b>p.I383M (het)</b> | 55  | 3.24 | 841 | na   | 1.9  | 5.49  | na   | 3 | n | 4.5 | adenomas atypical adenoma | y | n | y |
|         |   |     |   | sister   | II:1 | F | Neg                  | 42* | 2.1  | 30  | na   | 2.76 | na    | na   | / | / | /   |                           | n | n | n |

§ Neck ultrasonography: two extrathyroidal nodules behind the right and left thyroid lobes, suggestive of parathyroid lesions

Superscripts:

<sup>a</sup> No=number studied per kindred

<sup>b</sup> Neg=Tested negative for gcm2 variants

<sup>c</sup> Age at DX of PHPT (Y) = Age at Diagnosis of PHPT in years (Y) <sup>d</sup> Ser Total Ca =Serum Total Calcium, albumin-adjusted <sup>e</sup>

na=not available

<sup>f</sup> UCCR=Urinary Ca/Creatinine Clearance Ratio
