# Supplementary material for: Novel Glial Cells Missing-2 (GCM2) variants in parathyroid disorders
Source: PubMed Central journal article supplement (PMC8859918; doi:10.1530/eje-21-0433), 2022-01-13
Supplement: supplementary_table_2.pdf [file supplementary_table_2.pdf]

**Supplementary Table 2**  
**Characteristics of Parathyroid Carcinoma Patients**

| Patient Characteristics |     |                 |                                    | Initial Chemistries (normal range)           |                              |                                             |                         |                                     |                   | Parathyroid Characteristics             |                                    |                                    |                                   | Clinical Manifestations                                                        |    |    |
|-------------------------|-----|-----------------|------------------------------------|----------------------------------------------|------------------------------|---------------------------------------------|-------------------------|-------------------------------------|-------------------|-----------------------------------------|------------------------------------|------------------------------------|-----------------------------------|--------------------------------------------------------------------------------|----|----|
| Patient Name            | Sex | GCM2 Variant    | <sup>a</sup> Age at DX of PHPT (Y) | <sup>b</sup> Ser Total Ca (2.05-2.50 mmol/L) | Ser Intact PTH (10-65 pg/mL) | Ser Ion Ca <sup>2+</sup> (1.17-1.31 mmol/L) | Ser P (2.7 - 4.5 mg/dL) | 24-h Urine Ca (1.3 - 7.5 mmol/24 h) | <sup>d</sup> UCCR | Total <sup>e</sup> no of Excised Glands | Normal Glands by Biopsy (y/n) (no) | Largest Size of Largest Gland (cm) | Pathology of Excised parathyroids | Osteoporosis (O) Nephrolithiasis (N) Fractures (F)<br>Yes (y)/ No (n)<br>O N F |    |    |
| PA                      | F   | p.(V382M) (het) | 49                                 | 5.0                                          | 940                          | 2.5                                         | 1.34                    | na                                  | na                | 1                                       | n                                  | 4                                  | carcinoma                         | n                                                                              | n  | n  |
| KA                      | F   | None            | 55                                 | 3.87                                         | 873                          | 2.35                                        | 2.2                     | 19                                  | 0.225             | 2                                       | y (1)                              | 3                                  | carcinoma                         | na                                                                             | y  | na |
| BM                      | M   | None            | 76                                 | 3.37                                         | 1052                         | 2.13                                        | 1.82                    | 9.3                                 | 0.056             | 4                                       | n                                  | 4.5                                | carcinoma + atypical adenoma      | n                                                                              | y  | n  |
| CN                      | F   | None            | 65                                 | 3.32                                         | 229                          | <sup>c</sup> na                             | 2.2                     | na                                  | na                | 1                                       | n                                  | 4                                  | carcinoma                         | y                                                                              | n  | n  |
| CM                      | M   | None            | 44                                 | 2.52                                         | 163                          | 1.38                                        | 2.6                     | na                                  | na                | 1                                       | n                                  | 2                                  | carcinoma                         | y                                                                              | na | n  |
| CA                      | M   | None            | 57                                 | 3.72                                         | 690                          | 2.13                                        | 2.5                     | 9.7                                 | 0.045             | 1                                       | n                                  | 3.5                                | carcinoma                         | n                                                                              | n  | n  |
| GA                      | M   | None            | 57                                 | 3.22                                         | 1791                         | na                                          | 1.5                     | na                                  | na                | 4                                       | y (3)                              | 3                                  | carcinoma                         | y                                                                              | y  | y  |
| LA                      | F   | None            | 69                                 | 3.45                                         | 852                          | 1.91                                        | 1.72                    | 5.6                                 | 0.022             | 1                                       | n                                  | 2.9                                | carcinoma                         | n                                                                              | n  | n  |
| MM                      | F   | None            | 48                                 | 3.79                                         | 525                          | na                                          | 2.2                     | na                                  | na                | 1                                       | n                                  | 7                                  | carcinoma                         | na                                                                             | y  | na |
| OR                      | F   | None            | 43                                 | 3.09                                         | 344                          | na                                          | na                      | na                                  | na                | 2                                       | y (1)                              | 5                                  | carcinoma                         | n                                                                              | y  | n  |
| PN                      | F   | None            | 77                                 | 3.04                                         | 536                          | na                                          | 2.39                    | 11.15                               | na                | 2                                       | y (1)                              | 2                                  | carcinoma                         | y                                                                              | y  | n  |
| PAM                     | F   | None            | 46                                 | 3.09                                         | 539                          | 1.57                                        | 1.84                    | na                                  | na                | 3                                       | y (1)                              | 2.5                                | carcinoma                         | y                                                                              | y  | n  |
| PM                      | F   | None            | 53                                 | 4.52                                         | 2665                         | 2.31                                        | na                      | na                                  | na                | 2                                       | y (1)                              | 3.8                                | carcinoma                         | y                                                                              | n  | n  |
| RMV                     | F   | None            | 58                                 | 2.92                                         | 642                          | na                                          | na                      | 13.4                                | na                | 2                                       | y (1)                              | 6                                  | carcinoma                         | y                                                                              | na | y  |
| TA                      | F   | None            | 34                                 | 3.06                                         | 204                          | 1.62                                        | 2.54                    | 2.48                                | 0.039             | 1                                       | n                                  | 1.3                                | carcinoma                         | n                                                                              | y  | n  |
| TR                      | M   | None            | 55                                 | 3.22                                         | 252                          | 1.54                                        | 2.48                    | 14.3                                | na                | 1                                       | n                                  | 4.1                                | carcinoma                         | n                                                                              | y  | n  |

Superscripts:

<sup>a</sup> Age at DX of PHPT (Y)=Age at Diagnosis of PHPT in years(Y)

<sup>b</sup> Ser Total Ca =Serum Total Calcium, albumin-adjusted <sup>c</sup>

na=not available<sup>d</sup> UCCR=Urinary Ca/Creatinine Clearance

Ratio

<sup>e</sup> no=number
